# Supplementary material
Source: PubMed Central journal article supplement (PMC3321197)

Fig 1c

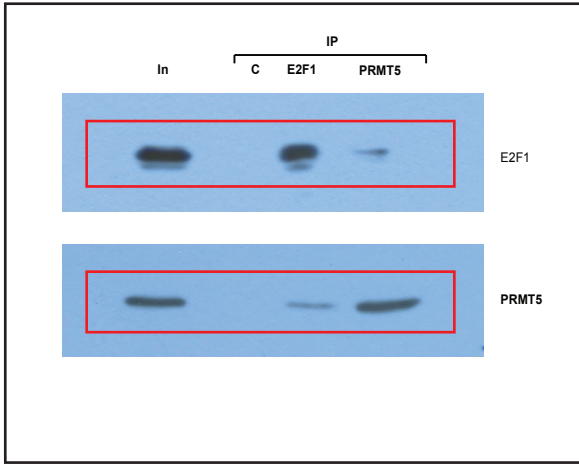

Fig 1d

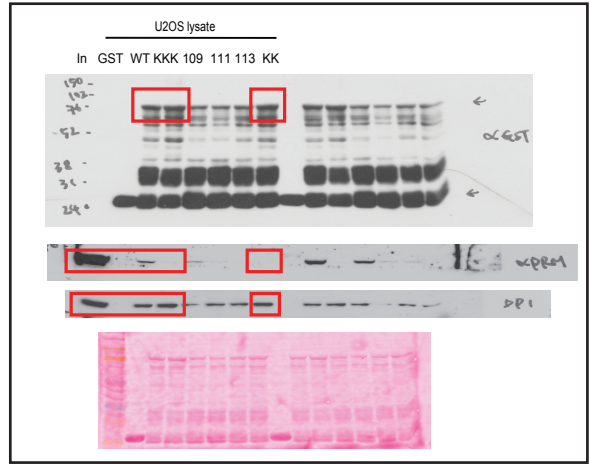

Fig 2c

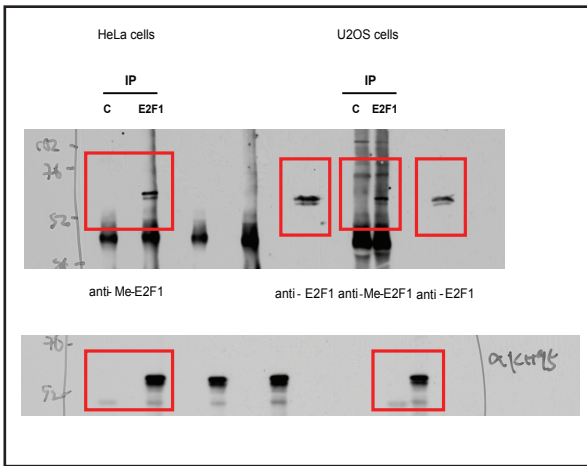

Fig 2gi, gii

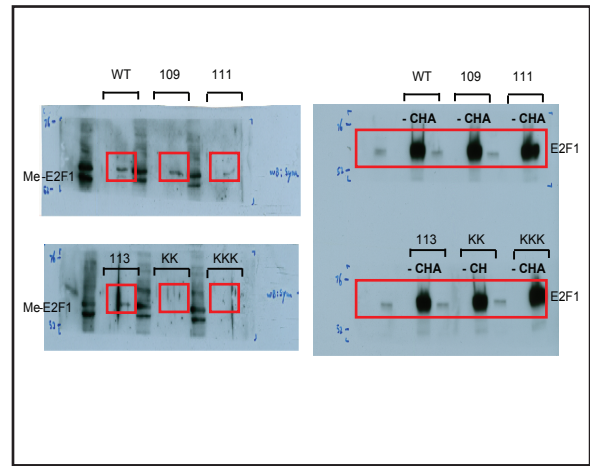

Fig 1e

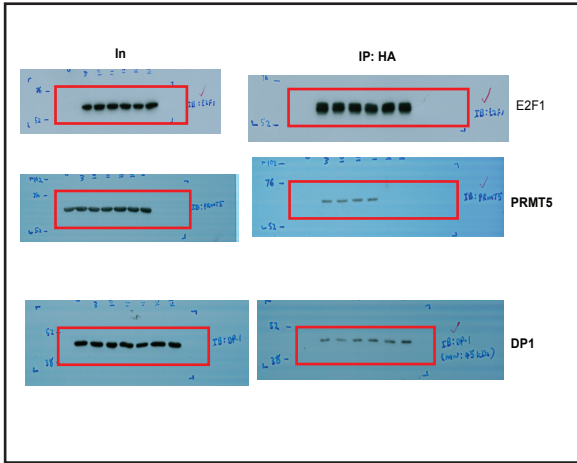

Fig 2f

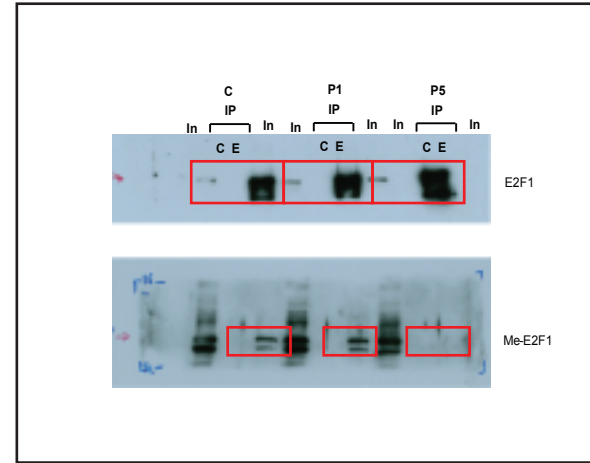

Fig 6hi

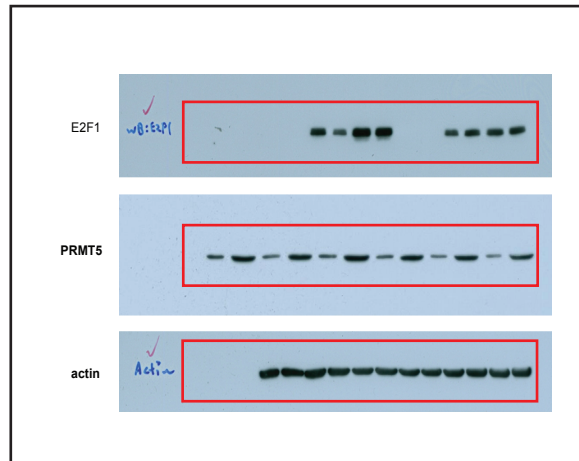

Supplement: emboj201217s2.pdf [file emboj201217s2.pdf]
